# Supplementary material for: Rapid Characterization of Complex Killer Cell Immunoglobulin-Like Receptor (KIR) Regions Using Cas9 Enrichment and Nanopore Sequencing
Source: Front Immunol. 2021 Sep 14;12:722181. doi: 10.3389/fimmu.2021.722181 (PMC8476923; doi:10.3389/fimmu.2021.722181)
Supplement: Supplementary file 2 [file Table_1.xlsx]

## Sheet: Blad1
Sup. Table I
Overview of crRNAs to enrich for the human KIR gene region. Benchling software was used to predict potential crRNA sequences for the KIR gene region [43]. The different crRNAs are combined into four different pools. All target sequences were followed by an NGG PAM. The on-target score is determined by the optimized metric of Doench, et al. [44].
Gene to gene fragments
Generic crRNAs
#	Pool	Target gene(s)	Cut site	Direction	crRNA sequence	On-target score
1	1	KIR2DL/S, KIR3DL/S, KIR2DP1, KIR3DP1	Intron 3	Reverse	CATAGAAAGATGGAGATGTG	71.1
2	2	KIR2DL/S, KIR3DL/S, KIR2DP1, KIR3DP1	Intron 3	Forward	TGTGAGCAAAGTCAGCATGG	73.9
3	2	KIR2DL/S, KIR3DL/S, KIR2DL4, KIR3DP1	Intron 4	Reverse	GACAAGGAAGAACCTCCCTG	76.0
4	1, 2	KIR2DL/S, KIR3DL/S, KIR2DL4, KIR2DP1, KIR3DP1	Intron 2	Forward	TGTGATTACACTGAGCCCAG	74.7
5	1, 2	KIR2DL/S, KIR3DL/S, KIR2DP1, KIR3DP1	Intron 2	Forward	CCTATGTGGATGGAGCCTGG	71.7
6	1, 2	KIR2DL/S, KIR3DL/S, KIR2DL4, KIR2DP1	Exon 4	Reverse	CATGTACCATCTATCCAGGG	71.8
7	1, 2	KIR2DL/S, KIR3DL/S, KIR2DP1, KIR3DP1	Exon 3	Reverse	GCATCTGTAGGTCCCTGCAA	70.1
8	1, 2	KIR2DL/S, KIR2DP1	Intron 3	Reverse	CCTGTGATGACGATGTCCAG	73.6
9	1, 2	KIR2DL/S, KIR2DP1	Intron 4	Forward	AGCGGTCAGGAGAGACCCAG	65.8
10	1, 2	KIR2DL/S, KIR2DP1	Intron 4	Forward	CAAACTCATGACCTCAACTG	72.8
11	1, 2	KIR2DL/S, KIR2DP1	Intron 4	Forward	ACCTTGAAGTCTCAAGACAG	66.4
12	3	KIR2DL/S, KIR3DL/S, KIR2DL4, KIR2DP1, KIR3DP1	Exon/Intron 4	Forward	CCTGTGACAGAAACAAGCAG	75.4
13	3	KIR3DL/S	Intron 5	Reverse	GGTGAATGGATAGAGAACTG	79.2
14	3	KIR3DL/S	Intron 5	Forward	TTCCTACCAACAGGGTACCA	61.0
15	3	KIR3DL/S	Intorn 5	Forward	GGAGATACAGATAGATCATG	71.4
Specific crRNAs
16	1	KIR3DL3	Exon 4	Reverse	TGACCTGGGAACCCGCATCG	71.4
17	1	KIR3DL3	Intron 3	Reverse	CCTATGTGGATCGAGCCTGG	72.9
18	1	LILRP2	Exon 2	Forward	GCATTACACGAACTTCCCCT	69.8
19	1	LILRP2	Intron 3	Forward	GGAGGTGTCAGCTCAGAACG	73.6
20	1	LILRP2	Exon 3	Forward	CAAATTCACTCTGTACAAGG	71.5
21	1	FcAR	Intron 2	Reverse	CCGACAGTATTAGATCATTG	67.1
22	1	FcAR	Intron 2	Reverse	GAGGAACTAAGAGAACCAAG	69.3
23	1, 2	KIR2DL4	Intron 6	Forward	TAGGCACAACTCCCACACTG	76.0
24	1, 2	KIR2DL4	Intron 3	Forward	TGGGCTCAGTGTAATCACAA	74.3
25	1, 2	KIR3DP1	Exon 5	Reverse	CCTGCCTTAACCATGGGGCG	58.3
26	1, 2	KIR3DP1	Exon 5	Reverse	CTAAGGTCTGACCACTCGTA	59.8
27	1, 3	KIR2DL4	Intron 6	Reverse	TCTACACTCAGCTTCCCGAG	74.8
28	1, 3	KIR3DL2	Intron 6	Forward	GATAAGAGGCATGAGCCACG	72.8
29	1, 3	FcAR	Intron 6	Reverse	ACTGTGCTCAAATTACATCA	72.2
30	1, 3	FcAR	Intron 2	Reverse	GACAACCACACAATAATAGG	69.2
Gene fragments
#	Pool	Target gene(s)	Cut site	Direction	crRNA sequence	On-target score
31	4	KIR2DL/S, KIR3DL/S, KIR2DP1, KIR3DP1	Exon/Intron 1	Forward	TGTGTTGGTGAGTCCTGGAA	67.7
32	4	KIR2DS, KIR3DL/S	Intron 1	Forward	TGAGTCCTGGAAGGGAATCG	66.3
33	4	KIR2DL/S, KIR3DL/S, KIR2DP1, KIR3DP1	Intron 1	Forward	GTGGAGATATAGGCCTGGAG	63.3
34	4	KIR2DL/S, KIR3DL/S, KIR2DP1, KIR3DP1	Exon 9	Reverse	TCAAGTGAAATGGAGAATTG	60.1
35	4	KIR2DL/S, KIR3DL/S, KIR2DP1	3' UTR	Reverse	AGGTGGAACAGCATGAGGGA	63.2
36	4	KIR2DL/S, KIR3DL/S, KIR2DP1, KIR3DP1	Exon 9	Reverse	TTTCTCTCCAGCAGGCAGTG	66.4
37	4	KIR3DL3, KIR2DL4	Exon 9	Reverse	CTCCCTAGAAGATCCCATCA	64.7
38	4	KIR2DL, KIR2DP1	Intron 1	Forward	CCAAGACTCACAGCCCAGTG	67.0
39	4	KIR2DL, KIR2DP1	Intron 1	Forward	TTGGGTGCAGGTAGGCACTG	63.9
40	4	KIR2DS, KIR2DP1	Intron 2	Forward	ACTAGGAAGAGGGGACCCTG	70.7
41	4	KIR2DL/S	Intron 1	Forward	CAAGACTCACAGCCCAGTGG	63.4
42	4	KIR3DL	Intron 2	Forward	GTCAAGCTCTGTGAAGACTG	72.8
43	4	KIR3DL, KIR2DL4	Intron 2	Forward	AGCAGGTCCTCTGAGGACAA	67.9
44	4	KIR3DL3, KIR2DL4	Intron 2	Forward	ACCCTCCAGCGTTTCCATGA	62.4
45	4	KIR2DL	Exon 9	Reverse	TACACGATGATATCTGTTGG	72.7
46	4	KIR2DL/S, KIR3DL3, KIR2DP1	Exon 9	Reverse	GTACATGGGAGCTGGCAACC	63.7
47	4	KIR2DL/S, KIR3DL/S	Intron 8	Reverse	GGGAAATGCTGAGTGAGGGA	64.6
48	4	KIR3DL, KIR2DL4	Intron 7/Exon 8	Reverse	ACAGCAGCATCTGTAGGAGA	63.7
49	4	KIR2DL, KIR3DL/S, KIR2DL4, KIR2DP1	Intron 8/Exon 9	Reverse	TTCATCAGAGTCCTGGAGAG	62.3
50	4	KIR3DP1	Intron 8	Reverse	CATTGACCTTGGGCACTGCA	62.9
Specific crRNAs
51	4	KIR2DL4	5' UTR	Forward	AATTCAATCGTCCCGTGCAG	62
52	4	KIR2DL4	5' UTR	Forward	TGTGTGTTGAGAAGATCATG	73.2
53	4	KIR2DL4	3' UTR	Reverse	GGAAAGGTGGAACAGCACGA	78.7
54	4	KIR3DL2	Intron 1	Forward	CTTGGCAGCAGGTAGCAGGG	73.3
