# Supplementary material for: Rapid Characterization of Complex Killer Cell Immunoglobulin-Like Receptor (KIR) Regions Using Cas9 Enrichment and Nanopore Sequencing
Source: Front Immunol. 2021 Sep 14;12:722181. doi: 10.3389/fimmu.2021.722181 (PMC8476923; doi:10.3389/fimmu.2021.722181)
Supplement: Supplementary file 3 [file Table_2.xlsx]

## Sheet: Blad1
Sup. Table II
Overview of crRNAs to enrich for the rhesus macaque KIR gene region. Benchling software was used to predict potential crRNA sequences for the KIR gene region [43]. The different crRNAs are combined into six different pools. All target sequences were followed by an NGG PAM. The on-target score is determined by the optimized metric of Doench, et al. [44].
Gene to gene fragments
Generic crRNAs
#	Pool	Target gene(s)	Cut site	Direction	crRNA sequence	On-target score
1	1	KIR2DL04, KIR2DP, KIR3DL20, KIR3DL/S	Intron 4	Forward	GACAAGGAAGAACCTCCCTG	76
2	1	KIR1D, KIR2DL04, KIR1D, KIR3DL/S	Exon 5	Forward	CATGTACCATCTATCCAGGG	72
3	1	KIR1D, KIR2DP, KIR3DL/S	Intron 4	Forward	CAGACCAGGTGTCATAACAG	72
4	1	KIR2DL04, KIR3DL20, KIR3DL/S	Intron 3	Reverse	GAAAATTATCACAAACATGG	70
5	1	KIR1D, KIR2DP, KIR3DL/S	Intron 4	Reverse	CGGCATCTGTAGGTGCCACA	66.5
6	2	KIR3DL20, KIR3DL/S	Intron 3	Forward	AGATGGAGGGACCTGCACCA	76
7	2	KIR1D, KIR2DP, KIR3DL/S	Intron 5	Forward	ATAACAGAGGACAGACACAG	81.2
8	2	KIR1D, KIR2DP, KIR3DL/S	Intron 5	Forward	CAGACCAGGTGTCATAACAG	77
9	1, 2	KIR2DL04, KIR3DL/S	Intron 3	Reverse	TCCACCTTCAAAGCCCACAG	72.6
Specific crRNAs
10	1	KIR3DL20	Exon 4	Reverse	CCTATGATCACGATGTCCAG	71
11	2	KIR2DL04	Intron 5	Reverse	CCTAAAAAGAGAACTTCCAG	71
12	3	LILRA6	Intron 6	Forward	GGGAGGACTGAAATGAGATA	61.5
13	3	KIR2DL04	Intron 5	Reverse	AATTAGTACAACTTTCACAG	74
14	4	KIR2DL04	Intron 1	Forward	AGATTCGGGGTCTCCCAACA	70.4
15	4	KIR2DL04	Intron 1	Forward	AGTGAACGTTCAGCCCAGCG	70
16	4	FcaR	Intron 2	Reverse	CCTTTAAATGAAGTGACAGG	66.6
17	1, 2, 4	FcaR	Intron 2	Reverse	TGGGCAGTCTAACACAGGCA	67.5
18	1, 2, 4	FcaR	Intron 2	Reverse	CTTCATGGGCAGTCTAACAC	62
19	1, 2, 4	KIR1D	Exon 3	Reverse	CTGTGACCATGATCGCCAGG	78.3
20	1, 3	LILRA6	Intron 6	Forward	AGACTGAGGATAGAAGATGG	72
21	1, 3	LILRA6	Intron 6	Forward	AGGACTGAAATGAGATACGG	72
Gene fragments
#	Pool	Target gene(s)	Cut site	Direction	crRNA sequence	On-target score
22	5	KIR3DL20, KIR1D, KIR3DL/S	3' UTR	Reverse	GGACTAGGAAGTAAGCCAGT	63
23	5	KIR3DL20, KIR1D, KIR3DL	3' UTR	Reverse	ACGTTCAGATTCGTGGTGTG	63
24	5	KIR3DL20, KIR2DL04, KIR3DL/S	3' UTR	Reverse	CTGAAAAATCGTCTGAGGGG	64
25	5	KIR3DL20, KIR1D, KIR2DL04, KIR3DL/S	3' UTR	Reverse	AGGTGGAACAGCATGAGGGA	63.7
26	5	KIR3DL20, KIR2DL04, KIR3DS	3' UTR	Reverse	AAGACTGAAAAATCGTCTGA	63.3
27	5	KIR1D, KIR3DL/S	5' UTR	Forward	GGTCAGCACGTCAACTGCAT	61.4
28	5	KIR3DL/S	5' UTR	Forward	TGGTCATAGTGAAGGACACA	66
29	5	KIR3DL	3' UTR	Reverse	ATGTTCAGATTCGTGGTGTG	63
30	6	KIR3DL20, KIR1D	3' UTR	Forward	CATCCAAAAATGCAGCACAT	67
31	6	KIR3DL20, KIR3DL/S	Intron 7	Reverse	AAGTCATCAAAACAGCTGGG	76.4
32	6	KIR3DL20 , KIR1D, KIR2DL04, KIR3DL/S	Exon 9	Reverse	GTGCGTATGTCACCTCCTGA	61.8
33	6	KIR1D, KIR3DL/S	Exon 2	Forward	CAGAGGGCCTGTCCACACAC	68.7
34	6	KIR1D, KIR2DL04, KIR3DL/S	Intron 2	Forward	TAGGAACAGCAGGTCCTCTG	67.3
35	6	KIR3DL	Exon 9	Reverse	TGGAAGTTCCGTGTACACGC	61.6
36	6	KIR3DL	Exon 9	Reverse	TTTTTCCCTGTGTGAGAACG	66.7
Specific crRNAs
37	5	KIR2DL04	5' UTR / Exon 1	Forward	CACCAAGTCCATGTCGCCCA	61.1
38	5	KIR2DL04	5' UTR	Forward	GCAGTGTTCCGGTATCAAGT	62.8
39	5	KIR3DL20	5' UTR	Forward	TGGCAATAGTGAAGGATGCA	62.4
40	5	KIR3DL20	5' UTR	Forward	TACGTCATCCTCTCATGATG	61.2
41	6	KIR2DL04	5' UTR	Reverse	TACGAACAAACTGAATCCCG	70
42	6	KIR2DL04	5' UTR	Reverse	ATGATCTTCTCAATACATGT	62.5
43	6	KIR3DL20	Intron 2	Forward	ACATGAGGCAGGCAGCACAA	70.3
44	6	KIR3DL20	Intron 2	Forward	GATGATTTTCTTGAAACATG	63.3
45	6	KIR3DL20	3' UTR	Forward	TTGAATTGACACAAATGGAG	64.8
